# Supplementary material
Source: HighWire-hosted journal article supplement (http://www.jrheum.org/highwire/filestream/30197/field_highwire_adjunct_files/0/160343_Data_Suppl.pdf)
Supplement: 160343_Data_Suppl.pdf [file 160343_Data_Suppl.pdf]

Supplementary Figure 1.

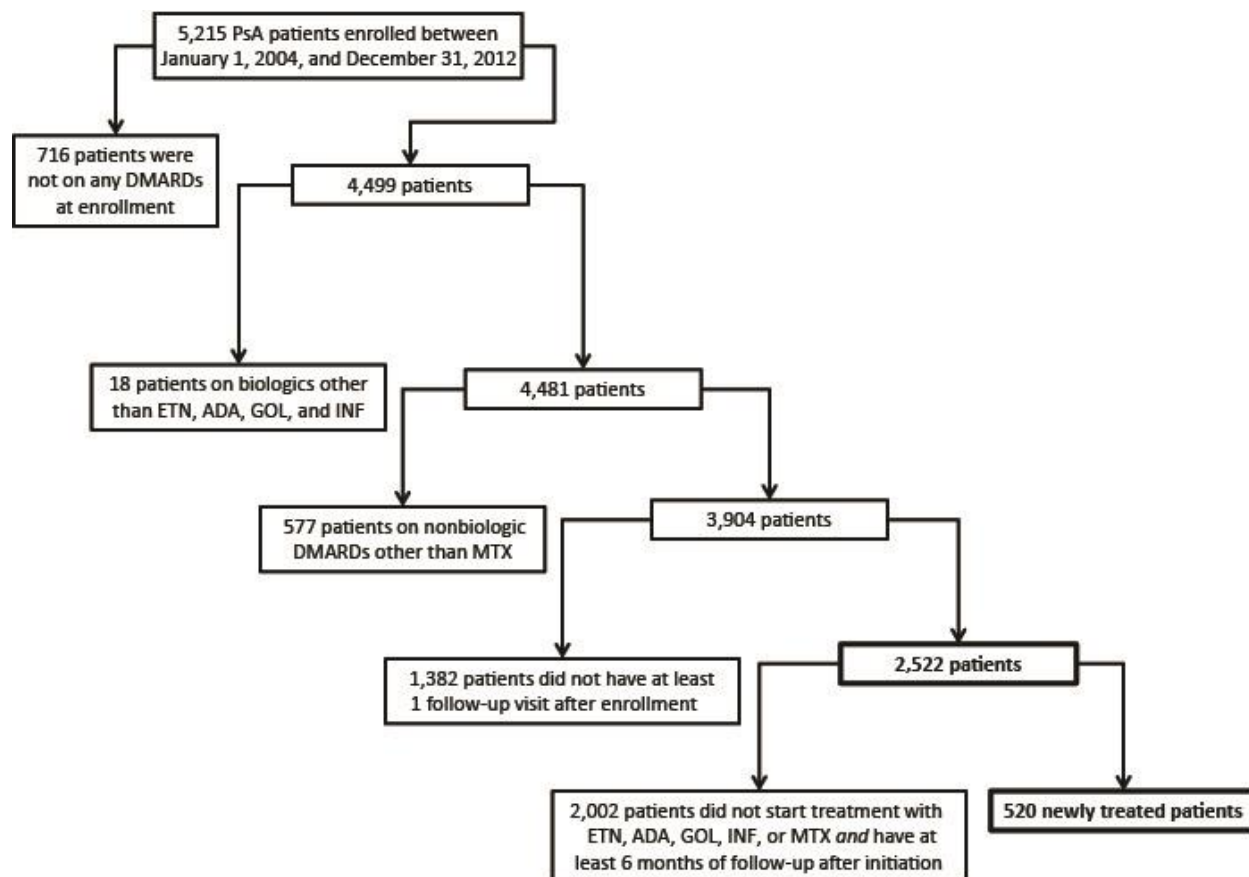

Patient attrition. The flow of patients from enrollment in the Corrona registry to study initiation. PsA: psoriatic arthritis; DMARD: disease-modifying antirheumatic drug; ETN: etanercept; ADA: adalimumab; GOL: golimumab; INF: infliximab; MTX: methotrexate.

Supplementary Figure 2.

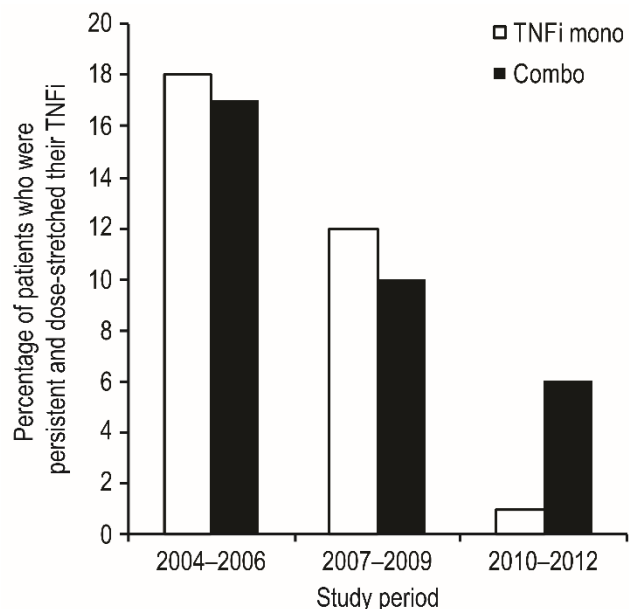

Percentage of patients with index TNFi monotherapy and combination therapy who were persistent for at least 12 months and dose-stretched. Patients dose-stretched if they reduced their TNFi dose: adalimumab < 40 mg every other week or < 80 mg monthly; etanercept < 50 mg weekly or < 200 mg monthly; golimumab < 50 mg monthly SC injection (if patients start at 100 mg monthly, they can reduce to 50 mg monthly; if patients start at 50 mg, they can reduce to 50 mg every 8 weeks or 25 mg monthly); infliximab reduction estimated from their starting dose of 3–10 mg/kg every 4–8 weeks, with an induction dose at weeks 0, 2, and 6. Patients receiving combination therapy could only dose-stretch their TNFi; MTX dose was not considered. TNFi: tumor necrosis factor inhibitor; mono: monotherapy; combo: combination; SC: subcutaneous; MTX: methotrexate.

Supplementary Table 1. Percentage of patients who were persistent on index therapy for at least 18 months.

|                     | 2004–2006 |             |                         | 2007–2009 |             |                         | 2010–2012 |             |                         |
|---------------------|-----------|-------------|-------------------------|-----------|-------------|-------------------------|-----------|-------------|-------------------------|
|                     | No.       |             | Time Taking             | No.       |             | Time Taking             | No.       |             | Time taking             |
|                     | Total     | Persistent  | Drug <sup>†</sup> , mos | Total     | Persistent  | Drug <sup>†</sup> , mos | Total     | Persistent  | Drug <sup>†</sup> , mos |
| Index Therapy       | Pts, N    | Pts*, n (%) | (SD)                    | Pts, N    | Pts*, n (%) | (SD)                    | Pts, N    | Pts*, n (%) | (SD)                    |
| TNFi monotherapy    | 51        | 32 (63)     | 50.0 (19.7)             | 69        | 35 (51)     | 37.9 (14.0)             | 70        | 18 (26)     | 25.5 (4.3)              |
| MTX monotherapy     | 36        | 15 (42)     | 51.5 (25.1)             | 83        | 36 (43)     | 35.8 (11.7)             | 98        | 15 (15)     | 22.1 (3.8)              |
| Combination therapy | 23        | 10 (43)     | 52.4 (26.0)             | 40        | 20 (50)     | 36.4 (10.8)             | 50        | 10 (20)     | 26.2 (4.1)              |

\* Persistence was measured at 18 months. <sup>†</sup> Time taking drug in persistent patients was measured throughout the duration of the entire study. TNFi: tumor necrosis factor inhibitor; MTX: methotrexate.
